# Supplementary material for: Green synthesis of silver nanoparticles using Sudanese Candida parapsilosis: a sustainable approach to combat antimicrobial resistance
Source: BMC Microbiol. 2025 May 21;25:312. doi: 10.1186/s12866-025-04038-9 (PMC12093675; doi:10.1186/s12866-025-04038-9)
Supplement: Supplementary file 1 — Supplementary Material 1 [file 12866_2025_4038_MOESM1_ESM.xlsx]

## Sheet: S_Table1
Supplementary Table (1) The Frequency of the isolated Bacterial Strains in different sample types (Urine, Wound, and Blood):
	No	TOS Urine		TOS Wound		TOS Blood
Bacterial Species		Count	%	Count	%	Count	%
Escherichia coli	10	9	25	0	0	1	2.38
Klebsiella pneumoniae	10	2	5.56	1	4.55	7	16.67
Pseudomonas aeruginosa	15	5	13.89	10	45.45	0	0
Acinetobacter baumannii	19	0	0	4	18.18	15	35.71
Serratia marcescens	5	5	13.89	0	0	0	0
Salmonella typhi	4	0	0	0	0	4	9.52
Staphylococcus aureus	12	0	0	2	9.09	10	23.81
Enterococcous faecalies	15	15	41.67	0	0	0	0
Listeria monocytogenes	5	0	0	0	0	5	11.9
Bacillus cereuse	5	0	0	5	22.73	0	0
Total	100	36	100	22	100	42	100

## Sheet: S_Table2
Supplementary Table 2: Resistance Profiles of Bacterial Species Against Various Antibiotics
Bacterial_Species	Antibiotics	Resistance_Level	Frequency	Total_No	Percentage
Acinetobacter_baumannii	Amikacin	Intermediate	4	19	21.0526
Acinetobacter_baumannii	Amoxicillin_Clavulanate	Intermediate	0	19	0
Acinetobacter_baumannii	Ampicillin	Intermediate	0	19	0
Acinetobacter_baumannii	Azithromycin	Intermediate	5	19	26.3158
Acinetobacter_baumannii	Aztreonam	Intermediate	0	19	0
Acinetobacter_baumannii	Bacitracin	Intermediate	0	19	0
Acinetobacter_baumannii	Cefalexin	Intermediate	0	19	0
Acinetobacter_baumannii	Cefepime	Intermediate	0	19	0
Acinetobacter_baumannii	Ceftazidim	Intermediate	0	19	0
Acinetobacter_baumannii	Chloramphenicol	Intermediate	2	19	10.5263
Acinetobacter_baumannii	Ciprofloxacin	Intermediate	5	19	26.3158
Acinetobacter_baumannii	Clindamycin	Intermediate	0	19	0
Acinetobacter_baumannii	Colistin	Intermediate	0	19	0
Acinetobacter_baumannii	Imipenem	Intermediate	0	19	0
Acinetobacter_baumannii	Levofloxacin	Intermediate	2	19	10.5263
Acinetobacter_baumannii	Nitrofurantoin	Intermediate	2	19	10.5263
Acinetobacter_baumannii	Piperacillin	Intermediate	0	19	0
Acinetobacter_baumannii	Tetracycline	Intermediate	0	19	0
Acinetobacter_baumannii	Trimethoprimulphate	Intermediate	0	19	0
Acinetobacter_baumannii	Vancomycin	Intermediate	0	19	0
Bacillus_cereus	Amikacin	Intermediate	0	5	0
Bacillus_cereus	Amoxicillin_Clavulanate	Intermediate	0	5	0
Bacillus_cereus	Ampicillin	Intermediate	0	5	0
Bacillus_cereus	Azithromycin	Intermediate	2	5	40
Bacillus_cereus	Aztreonam	Intermediate	0	5	0
Bacillus_cereus	Bacitracin	Intermediate	0	5	0
Bacillus_cereus	Cefalexin	Intermediate	0	5	0
Bacillus_cereus	Cefepime	Intermediate	0	5	0
Bacillus_cereus	Ceftazidim	Intermediate	0	5	0
Bacillus_cereus	Chloramphenicol	Intermediate	0	5	0
Bacillus_cereus	Ciprofloxacin	Intermediate	2	5	40
Bacillus_cereus	Clindamycin	Intermediate	0	5	0
Bacillus_cereus	Colistin	Intermediate	2	5	40
Bacillus_cereus	Imipenem	Intermediate	0	5	0
Bacillus_cereus	Levofloxacin	Intermediate	1	5	20
Bacillus_cereus	Nitrofurantoin	Intermediate	0	5	0
Bacillus_cereus	Piperacillin	Intermediate	0	5	0
Bacillus_cereus	Tetracycline	Intermediate	0	5	0
Bacillus_cereus	Trimethoprimulphate	Intermediate	2	5	40
Bacillus_cereus	Vancomycin	Intermediate	0	5	0
Enterococcus_faecalis	Amikacin	Intermediate	0	15	0
Enterococcus_faecalis	Amoxicillin_Clavulanate	Intermediate	4	15	26.6667
Enterococcus_faecalis	Ampicillin	Intermediate	0	15	0
Enterococcus_faecalis	Azithromycin	Intermediate	0	15	0
Enterococcus_faecalis	Aztreonam	Intermediate	0	15	0
Enterococcus_faecalis	Bacitracin	Intermediate	2	15	13.3333
Enterococcus_faecalis	Cefalexin	Intermediate	3	15	20
Enterococcus_faecalis	Cefepime	Intermediate	0	15	0
Enterococcus_faecalis	Ceftazidim	Intermediate	1	15	6.66667
Enterococcus_faecalis	Chloramphenicol	Intermediate	0	15	0
Enterococcus_faecalis	Ciprofloxacin	Intermediate	2	15	13.3333
Enterococcus_faecalis	Clindamycin	Intermediate	0	15	0
Enterococcus_faecalis	Colistin	Intermediate	2	15	13.3333
Enterococcus_faecalis	Imipenem	Intermediate	2	15	13.3333
Enterococcus_faecalis	Levofloxacin	Intermediate	3	15	20
Enterococcus_faecalis	Nitrofurantoin	Intermediate	3	15	20
Enterococcus_faecalis	Piperacillin	Intermediate	2	15	13.3333
Enterococcus_faecalis	Tetracycline	Intermediate	0	15	0
Enterococcus_faecalis	Trimethoprimulphate	Intermediate	0	15	0
Enterococcus_faecalis	Vancomycin	Intermediate	0	15	0
Escherichia_coli	Amikacin	Intermediate	0	10	0
Escherichia_coli	Amoxicillin_Clavulanate	Intermediate	2	10	20
Escherichia_coli	Ampicillin	Intermediate	0	10	0
Escherichia_coli	Azithromycin	Intermediate	2	10	20
Escherichia_coli	Aztreonam	Intermediate	2	10	20
Escherichia_coli	Bacitracin	Intermediate	0	10	0
Escherichia_coli	Cefalexin	Intermediate	0	10	0
Escherichia_coli	Cefepime	Intermediate	0	10	0
Escherichia_coli	Ceftazidim	Intermediate	0	10	0
Escherichia_coli	Chloramphenicol	Intermediate	0	10	0
Escherichia_coli	Ciprofloxacin	Intermediate	0	10	0
Escherichia_coli	Clindamycin	Intermediate	1	10	10
Escherichia_coli	Colistin	Intermediate	2	10	20
Escherichia_coli	Imipenem	Intermediate	0	10	0
Escherichia_coli	Levofloxacin	Intermediate	0	10	0
Escherichia_coli	Nitrofurantoin	Intermediate	2	10	20
Escherichia_coli	Piperacillin	Intermediate	0	10	0
Escherichia_coli	Tetracycline	Intermediate	0	10	0
Escherichia_coli	Trimethoprimulphate	Intermediate	0	10	0
Escherichia_coli	Vancomycin	Intermediate	0	10	0
Klebsiella_pneumoniae	Amikacin	Intermediate	2	10	20
Klebsiella_pneumoniae	Amoxicillin_Clavulanate	Intermediate	0	10	0
Klebsiella_pneumoniae	Ampicillin	Intermediate	0	10	0
Klebsiella_pneumoniae	Azithromycin	Intermediate	2	10	20
Klebsiella_pneumoniae	Aztreonam	Intermediate	3	10	30
Klebsiella_pneumoniae	Bacitracin	Intermediate	0	10	0
Klebsiella_pneumoniae	Cefalexin	Intermediate	0	10	0
Klebsiella_pneumoniae	Cefepime	Intermediate	0	10	0
Klebsiella_pneumoniae	Ceftazidim	Intermediate	0	10	0
Klebsiella_pneumoniae	Chloramphenicol	Intermediate	0	10	0
Klebsiella_pneumoniae	Ciprofloxacin	Intermediate	0	10	0
Klebsiella_pneumoniae	Clindamycin	Intermediate	2	10	20
Klebsiella_pneumoniae	Colistin	Intermediate	0	10	0
Klebsiella_pneumoniae	Imipenem	Intermediate	2	10	20
Klebsiella_pneumoniae	Levofloxacin	Intermediate	0	10	0
Klebsiella_pneumoniae	Nitrofurantoin	Intermediate	2	10	20
Klebsiella_pneumoniae	Piperacillin	Intermediate	0	10	0
Klebsiella_pneumoniae	Tetracycline	Intermediate	0	10	0
Klebsiella_pneumoniae	Trimethoprimulphate	Intermediate	1	10	10
Klebsiella_pneumoniae	Vancomycin	Intermediate	0	10	0
Listeria_monocytogenes	Amikacin	Intermediate	0	5	0
Listeria_monocytogenes	Amoxicillin_Clavulanate	Intermediate	0	5	0
Listeria_monocytogenes	Ampicillin	Intermediate	1	5	20
Listeria_monocytogenes	Azithromycin	Intermediate	0	5	0
Listeria_monocytogenes	Aztreonam	Intermediate	1	5	20
Listeria_monocytogenes	Bacitracin	Intermediate	0	5	0
Listeria_monocytogenes	Cefalexin	Intermediate	1	5	20
Listeria_monocytogenes	Cefepime	Intermediate	2	5	40
Listeria_monocytogenes	Ceftazidim	Intermediate	0	5	0
Listeria_monocytogenes	Chloramphenicol	Intermediate	0	5	0
Listeria_monocytogenes	Ciprofloxacin	Intermediate	0	5	0
Listeria_monocytogenes	Clindamycin	Intermediate	1	5	20
Listeria_monocytogenes	Colistin	Intermediate	1	5	20
Listeria_monocytogenes	Imipenem	Intermediate	0	5	0
Listeria_monocytogenes	Levofloxacin	Intermediate	0	5	0
Listeria_monocytogenes	Nitrofurantoin	Intermediate	0	5	0
Listeria_monocytogenes	Piperacillin	Intermediate	2	5	40
Listeria_monocytogenes	Tetracycline	Intermediate	0	5	0
Listeria_monocytogenes	Trimethoprimulphate	Intermediate	0	5	0
Listeria_monocytogenes	Vancomycin	Intermediate	0	5	0
Pseudomonas_aeruginosa	Amikacin	Intermediate	4	15	26.6667
Pseudomonas_aeruginosa	Amoxicillin_Clavulanate	Intermediate	1	15	6.66667
Pseudomonas_aeruginosa	Ampicillin	Intermediate	0	15	0
Pseudomonas_aeruginosa	Azithromycin	Intermediate	5	15	33.3333
Pseudomonas_aeruginosa	Aztreonam	Intermediate	0	15	0
Pseudomonas_aeruginosa	Bacitracin	Intermediate	0	15	0
Pseudomonas_aeruginosa	Cefalexin	Intermediate	0	15	0
Pseudomonas_aeruginosa	Cefepime	Intermediate	1	15	6.66667
Pseudomonas_aeruginosa	Ceftazidim	Intermediate	2	15	13.3333
Pseudomonas_aeruginosa	Chloramphenicol	Intermediate	7	15	46.6667
Pseudomonas_aeruginosa	Ciprofloxacin	Intermediate	0	15	0
Pseudomonas_aeruginosa	Clindamycin	Intermediate	0	15	0
Pseudomonas_aeruginosa	Colistin	Intermediate	0	15	0
Pseudomonas_aeruginosa	Imipenem	Intermediate	0	15	0
Pseudomonas_aeruginosa	Levofloxacin	Intermediate	5	15	33.3333
Pseudomonas_aeruginosa	Nitrofurantoin	Intermediate	1	15	6.66667
Pseudomonas_aeruginosa	Piperacillin	Intermediate	1	15	6.66667
Pseudomonas_aeruginosa	Tetracycline	Intermediate	2	15	13.3333
Pseudomonas_aeruginosa	Trimethoprimulphate	Intermediate	0	15	0
Pseudomonas_aeruginosa	Vancomycin	Intermediate	0	15	0
Salmonella_typhi	Amikacin	Intermediate	0	4	0
Salmonella_typhi	Amoxicillin_Clavulanate	Intermediate	1	4	25
Salmonella_typhi	Ampicillin	Intermediate	2	4	50
Salmonella_typhi	Azithromycin	Intermediate	2	4	50
Salmonella_typhi	Aztreonam	Intermediate	0	4	0
Salmonella_typhi	Bacitracin	Intermediate	0	4	0
Salmonella_typhi	Cefalexin	Intermediate	0	4	0
Salmonella_typhi	Cefepime	Intermediate	0	4	0
Salmonella_typhi	Ceftazidim	Intermediate	0	4	0
Salmonella_typhi	Chloramphenicol	Intermediate	1	4	25
Salmonella_typhi	Ciprofloxacin	Intermediate	0	4	0
Salmonella_typhi	Clindamycin	Intermediate	0	4	0
Salmonella_typhi	Colistin	Intermediate	0	4	0
Salmonella_typhi	Imipenem	Intermediate	0	4	0
Salmonella_typhi	Levofloxacin	Intermediate	0	4	0
Salmonella_typhi	Nitrofurantoin	Intermediate	1	4	25
Salmonella_typhi	Piperacillin	Intermediate	2	4	50
Salmonella_typhi	Tetracycline	Intermediate	0	4	0
Salmonella_typhi	Trimethoprimulphate	Intermediate	0	4	0
Salmonella_typhi	Vancomycin	Intermediate	0	4	0
Serratia_marcescens	Amikacin	Intermediate	0	5	0
Serratia_marcescens	Amoxicillin_Clavulanate	Intermediate	0	5	0
Serratia_marcescens	Ampicillin	Intermediate	2	5	40
Serratia_marcescens	Azithromycin	Intermediate	1	5	20
Serratia_marcescens	Aztreonam	Intermediate	2	5	40
Serratia_marcescens	Bacitracin	Intermediate	0	5	0
Serratia_marcescens	Cefalexin	Intermediate	0	5	0
Serratia_marcescens	Cefepime	Intermediate	0	5	0
Serratia_marcescens	Ceftazidim	Intermediate	3	5	60
Serratia_marcescens	Chloramphenicol	Intermediate	0	5	0
Serratia_marcescens	Ciprofloxacin	Intermediate	0	5	0
Serratia_marcescens	Clindamycin	Intermediate	1	5	20
Serratia_marcescens	Colistin	Intermediate	0	5	0
Serratia_marcescens	Imipenem	Intermediate	0	5	0
Serratia_marcescens	Levofloxacin	Intermediate	0	5	0
Serratia_marcescens	Nitrofurantoin	Intermediate	3	5	60
Serratia_marcescens	Piperacillin	Intermediate	0	5	0
Serratia_marcescens	Tetracycline	Intermediate	0	5	0
Serratia_marcescens	Trimethoprimulphate	Intermediate	0	5	0
Serratia_marcescens	Vancomycin	Intermediate	0	5	0
Staphylococcus_aureus	Amikacin	Intermediate	2	12	16.6667
Staphylococcus_aureus	Amoxicillin_Clavulanate	Intermediate	2	12	16.6667
Staphylococcus_aureus	Ampicillin	Intermediate	1	12	8.33333
Staphylococcus_aureus	Azithromycin	Intermediate	4	12	33.3333
Staphylococcus_aureus	Aztreonam	Intermediate	2	12	16.6667
Staphylococcus_aureus	Bacitracin	Intermediate	0	12	0
Staphylococcus_aureus	Cefalexin	Intermediate	0	12	0
Staphylococcus_aureus	Cefepime	Intermediate	1	12	8.33333
Staphylococcus_aureus	Ceftazidim	Intermediate	0	12	0
Staphylococcus_aureus	Chloramphenicol	Intermediate	2	12	16.6667
Staphylococcus_aureus	Ciprofloxacin	Intermediate	4	12	33.3333
Staphylococcus_aureus	Clindamycin	Intermediate	2	12	16.6667
Staphylococcus_aureus	Colistin	Intermediate	0	12	0
Staphylococcus_aureus	Imipenem	Intermediate	0	12	0
Staphylococcus_aureus	Levofloxacin	Intermediate	4	12	33.3333
Staphylococcus_aureus	Nitrofurantoin	Intermediate	2	12	16.6667
Staphylococcus_aureus	Piperacillin	Intermediate	0	12	0
Staphylococcus_aureus	Tetracycline	Intermediate	0	12	0
Staphylococcus_aureus	Trimethoprimulphate	Intermediate	0	12	0
Staphylococcus_aureus	Vancomycin	Intermediate	2	12	16.6667
Acinetobacter_baumannii	Amikacin	Resistant	11	19	57.8947
Acinetobacter_baumannii	Amoxicillin_Clavulanate	Resistant	18	19	94.7368
Acinetobacter_baumannii	Ampicillin	Resistant	19	19	100
Acinetobacter_baumannii	Azithromycin	Resistant	7	19	36.8421
Acinetobacter_baumannii	Aztreonam	Resistant	13	19	68.4211
Acinetobacter_baumannii	Bacitracin	Resistant	19	19	100
Acinetobacter_baumannii	Cefalexin	Resistant	19	19	100
Acinetobacter_baumannii	Cefepime	Resistant	5	19	26.3158
Acinetobacter_baumannii	Ceftazidim	Resistant	6	19	31.5789
Acinetobacter_baumannii	Chloramphenicol	Resistant	12	19	63.1579
Acinetobacter_baumannii	Ciprofloxacin	Resistant	9	19	47.3684
Acinetobacter_baumannii	Clindamycin	Resistant	19	19	100
Acinetobacter_baumannii	Colistin	Resistant	19	19	100
Acinetobacter_baumannii	Imipenem	Resistant	0	19	0
Acinetobacter_baumannii	Levofloxacin	Resistant	8	19	42.1053
Acinetobacter_baumannii	Nitrofurantoin	Resistant	14	19	73.6842
Acinetobacter_baumannii	Piperacillin	Resistant	19	19	100
Acinetobacter_baumannii	Tetracycline	Resistant	19	19	100
Acinetobacter_baumannii	Trimethoprimulphate	Resistant	0	19	0
Acinetobacter_baumannii	Vancomycin	Resistant	19	19	100
Bacillus_cereus	Amikacin	Resistant	0	5	0
Bacillus_cereus	Amoxicillin_Clavulanate	Resistant	0	5	0
Bacillus_cereus	Ampicillin	Resistant	0	5	0
Bacillus_cereus	Azithromycin	Resistant	0	5	0
Bacillus_cereus	Aztreonam	Resistant	5	5	100
Bacillus_cereus	Bacitracin	Resistant	3	5	60
Bacillus_cereus	Cefalexin	Resistant	2	5	40
Bacillus_cereus	Cefepime	Resistant	0	5	0
Bacillus_cereus	Ceftazidim	Resistant	3	5	60
Bacillus_cereus	Chloramphenicol	Resistant	0	5	0
Bacillus_cereus	Ciprofloxacin	Resistant	1	5	20
Bacillus_cereus	Clindamycin	Resistant	2	5	40
Bacillus_cereus	Colistin	Resistant	3	5	60
Bacillus_cereus	Imipenem	Resistant	0	5	0
Bacillus_cereus	Levofloxacin	Resistant	0	5	0
Bacillus_cereus	Nitrofurantoin	Resistant	5	5	100
Bacillus_cereus	Piperacillin	Resistant	0	5	0
Bacillus_cereus	Tetracycline	Resistant	0	5	0
Bacillus_cereus	Trimethoprimulphate	Resistant	0	5	0
Bacillus_cereus	Vancomycin	Resistant	2	5	40
Enterococcus_faecalis	Amikacin	Resistant	15	15	100
Enterococcus_faecalis	Amoxicillin_Clavulanate	Resistant	11	15	73.3333
Enterococcus_faecalis	Ampicillin	Resistant	15	15	100
Enterococcus_faecalis	Azithromycin	Resistant	13	15	86.6667
Enterococcus_faecalis	Aztreonam	Resistant	10	15	66.6667
Enterococcus_faecalis	Bacitracin	Resistant	13	15	86.6667
Enterococcus_faecalis	Cefalexin	Resistant	10	15	66.6667
Enterococcus_faecalis	Cefepime	Resistant	11	15	73.3333
Enterococcus_faecalis	Ceftazidim	Resistant	10	15	66.6667
Enterococcus_faecalis	Chloramphenicol	Resistant	5	15	33.3333
Enterococcus_faecalis	Ciprofloxacin	Resistant	8	15	53.3333
Enterococcus_faecalis	Clindamycin	Resistant	8	15	53.3333
Enterococcus_faecalis	Colistin	Resistant	13	15	86.6667
Enterococcus_faecalis	Imipenem	Resistant	1	15	6.66667
Enterococcus_faecalis	Levofloxacin	Resistant	7	15	46.6667
Enterococcus_faecalis	Nitrofurantoin	Resistant	6	15	40
Enterococcus_faecalis	Piperacillin	Resistant	11	15	73.3333
Enterococcus_faecalis	Tetracycline	Resistant	15	15	100
Enterococcus_faecalis	Trimethoprimulphate	Resistant	12	15	80
Enterococcus_faecalis	Vancomycin	Resistant	5	15	33.3333
Escherichia_coli	Amikacin	Resistant	2	10	20
Escherichia_coli	Amoxicillin_Clavulanate	Resistant	8	10	80
Escherichia_coli	Ampicillin	Resistant	10	10	100
Escherichia_coli	Azithromycin	Resistant	6	10	60
Escherichia_coli	Aztreonam	Resistant	8	10	80
Escherichia_coli	Bacitracin	Resistant	10	10	100
Escherichia_coli	Cefalexin	Resistant	10	10	100
Escherichia_coli	Cefepime	Resistant	10	10	100
Escherichia_coli	Ceftazidim	Resistant	8	10	80
Escherichia_coli	Chloramphenicol	Resistant	0	10	0
Escherichia_coli	Ciprofloxacin	Resistant	6	10	60
Escherichia_coli	Clindamycin	Resistant	7	10	70
Escherichia_coli	Colistin	Resistant	2	10	20
Escherichia_coli	Imipenem	Resistant	0	10	0
Escherichia_coli	Levofloxacin	Resistant	2	10	20
Escherichia_coli	Nitrofurantoin	Resistant	0	10	0
Escherichia_coli	Piperacillin	Resistant	10	10	100
Escherichia_coli	Tetracycline	Resistant	10	10	100
Escherichia_coli	Trimethoprimulphate	Resistant	10	10	100
Escherichia_coli	Vancomycin	Resistant	10	10	100
Klebsiella_pneumoniae	Amikacin	Resistant	7	10	70
Klebsiella_pneumoniae	Amoxicillin_Clavulanate	Resistant	9	10	90
Klebsiella_pneumoniae	Ampicillin	Resistant	10	10	100
Klebsiella_pneumoniae	Azithromycin	Resistant	8	10	80
Klebsiella_pneumoniae	Aztreonam	Resistant	6	10	60
Klebsiella_pneumoniae	Bacitracin	Resistant	10	10	100
Klebsiella_pneumoniae	Cefalexin	Resistant	10	10	100
Klebsiella_pneumoniae	Cefepime	Resistant	10	10	100
Klebsiella_pneumoniae	Ceftazidim	Resistant	9	10	90
Klebsiella_pneumoniae	Chloramphenicol	Resistant	8	10	80
Klebsiella_pneumoniae	Ciprofloxacin	Resistant	10	10	100
Klebsiella_pneumoniae	Clindamycin	Resistant	7	10	70
Klebsiella_pneumoniae	Colistin	Resistant	10	10	100
Klebsiella_pneumoniae	Imipenem	Resistant	2	10	20
Klebsiella_pneumoniae	Levofloxacin	Resistant	2	10	20
Klebsiella_pneumoniae	Nitrofurantoin	Resistant	6	10	60
Klebsiella_pneumoniae	Piperacillin	Resistant	10	10	100
Klebsiella_pneumoniae	Tetracycline	Resistant	10	10	100
Klebsiella_pneumoniae	Trimethoprimulphate	Resistant	7	10	70
Klebsiella_pneumoniae	Vancomycin	Resistant	10	10	100
Listeria_monocytogenes	Amikacin	Resistant	0	5	0
Listeria_monocytogenes	Amoxicillin_Clavulanate	Resistant	1	5	20
Listeria_monocytogenes	Ampicillin	Resistant	2	5	40
Listeria_monocytogenes	Azithromycin	Resistant	1	5	20
Listeria_monocytogenes	Aztreonam	Resistant	2	5	40
Listeria_monocytogenes	Bacitracin	Resistant	1	5	20
Listeria_monocytogenes	Cefalexin	Resistant	0	5	0
Listeria_monocytogenes	Cefepime	Resistant	2	5	40
Listeria_monocytogenes	Ceftazidim	Resistant	3	5	60
Listeria_monocytogenes	Chloramphenicol	Resistant	0	5	0
Listeria_monocytogenes	Ciprofloxacin	Resistant	3	5	60
Listeria_monocytogenes	Clindamycin	Resistant	2	5	40
Listeria_monocytogenes	Colistin	Resistant	2	5	40
Listeria_monocytogenes	Imipenem	Resistant	0	5	0
Listeria_monocytogenes	Levofloxacin	Resistant	0	5	0
Listeria_monocytogenes	Nitrofurantoin	Resistant	5	5	100
Listeria_monocytogenes	Piperacillin	Resistant	1	5	20
Listeria_monocytogenes	Tetracycline	Resistant	0	5	0
Listeria_monocytogenes	Trimethoprimulphate	Resistant	0	5	0
Listeria_monocytogenes	Vancomycin	Resistant	2	5	40
Pseudomonas_aeruginosa	Amikacin	Resistant	8	15	53.3333
Pseudomonas_aeruginosa	Amoxicillin_Clavulanate	Resistant	14	15	93.3333
Pseudomonas_aeruginosa	Ampicillin	Resistant	15	15	100
Pseudomonas_aeruginosa	Azithromycin	Resistant	8	15	53.3333
Pseudomonas_aeruginosa	Aztreonam	Resistant	6	15	40
Pseudomonas_aeruginosa	Bacitracin	Resistant	15	15	100
Pseudomonas_aeruginosa	Cefalexin	Resistant	15	15	100
Pseudomonas_aeruginosa	Cefepime	Resistant	8	15	53.3333
Pseudomonas_aeruginosa	Ceftazidim	Resistant	5	15	33.3333
Pseudomonas_aeruginosa	Chloramphenicol	Resistant	8	15	53.3333
Pseudomonas_aeruginosa	Ciprofloxacin	Resistant	15	15	100
Pseudomonas_aeruginosa	Clindamycin	Resistant	1	15	6.66667
Pseudomonas_aeruginosa	Colistin	Resistant	15	15	100
Pseudomonas_aeruginosa	Imipenem	Resistant	4	15	26.6667
Pseudomonas_aeruginosa	Levofloxacin	Resistant	9	15	60
Pseudomonas_aeruginosa	Nitrofurantoin	Resistant	9	15	60
Pseudomonas_aeruginosa	Piperacillin	Resistant	4	15	26.6667
Pseudomonas_aeruginosa	Tetracycline	Resistant	11	15	73.3333
Pseudomonas_aeruginosa	Trimethoprimulphate	Resistant	15	15	100
Pseudomonas_aeruginosa	Vancomycin	Resistant	15	15	100
Salmonella_typhi	Amikacin	Resistant	0	4	0
Salmonella_typhi	Amoxicillin_Clavulanate	Resistant	3	4	75
Salmonella_typhi	Ampicillin	Resistant	2	4	50
Salmonella_typhi	Azithromycin	Resistant	1	4	25
Salmonella_typhi	Aztreonam	Resistant	0	4	0
Salmonella_typhi	Bacitracin	Resistant	4	4	100
Salmonella_typhi	Cefalexin	Resistant	4	4	100
Salmonella_typhi	Cefepime	Resistant	0	4	0
Salmonella_typhi	Ceftazidim	Resistant	4	4	100
Salmonella_typhi	Chloramphenicol	Resistant	2	4	50
Salmonella_typhi	Ciprofloxacin	Resistant	2	4	50
Salmonella_typhi	Clindamycin	Resistant	0	4	0
Salmonella_typhi	Colistin	Resistant	0	4	0
Salmonella_typhi	Imipenem	Resistant	0	4	0
Salmonella_typhi	Levofloxacin	Resistant	0	4	0
Salmonella_typhi	Nitrofurantoin	Resistant	0	4	0
Salmonella_typhi	Piperacillin	Resistant	0	4	0
Salmonella_typhi	Tetracycline	Resistant	4	4	100
Salmonella_typhi	Trimethoprimulphate	Resistant	0	4	0
Salmonella_typhi	Vancomycin	Resistant	4	4	100
Serratia_marcescens	Amikacin	Resistant	2	5	40
Serratia_marcescens	Amoxicillin_Clavulanate	Resistant	0	5	0
Serratia_marcescens	Ampicillin	Resistant	3	5	60
Serratia_marcescens	Azithromycin	Resistant	3	5	60
Serratia_marcescens	Aztreonam	Resistant	3	5	60
Serratia_marcescens	Bacitracin	Resistant	5	5	100
Serratia_marcescens	Cefalexin	Resistant	5	5	100
Serratia_marcescens	Cefepime	Resistant	0	5	0
Serratia_marcescens	Ceftazidim	Resistant	2	5	40
Serratia_marcescens	Chloramphenicol	Resistant	1	5	20
Serratia_marcescens	Ciprofloxacin	Resistant	1	5	20
Serratia_marcescens	Clindamycin	Resistant	0	5	0
Serratia_marcescens	Colistin	Resistant	5	5	100
Serratia_marcescens	Imipenem	Resistant	0	5	0
Serratia_marcescens	Levofloxacin	Resistant	0	5	0
Serratia_marcescens	Nitrofurantoin	Resistant	0	5	0
Serratia_marcescens	Piperacillin	Resistant	0	5	0
Serratia_marcescens	Tetracycline	Resistant	5	5	100
Serratia_marcescens	Trimethoprimulphate	Resistant	0	5	0
Serratia_marcescens	Vancomycin	Resistant	5	5	100
Staphylococcus_aureus	Amikacin	Resistant	6	12	50
Staphylococcus_aureus	Amoxicillin_Clavulanate	Resistant	9	12	75
Staphylococcus_aureus	Ampicillin	Resistant	11	12	91.6667
Staphylococcus_aureus	Azithromycin	Resistant	8	12	66.6667
Staphylococcus_aureus	Aztreonam	Resistant	10	12	83.3333
Staphylococcus_aureus	Bacitracin	Resistant	8	12	66.6667
Staphylococcus_aureus	Cefalexin	Resistant	9	12	75
Staphylococcus_aureus	Cefepime	Resistant	6	12	50
Staphylococcus_aureus	Ceftazidim	Resistant	10	12	83.3333
Staphylococcus_aureus	Chloramphenicol	Resistant	0	12	0
Staphylococcus_aureus	Ciprofloxacin	Resistant	8	12	66.6667
Staphylococcus_aureus	Clindamycin	Resistant	6	12	50
Staphylococcus_aureus	Colistin	Resistant	12	12	100
Staphylococcus_aureus	Imipenem	Resistant	0	12	0
Staphylococcus_aureus	Levofloxacin	Resistant	2	12	16.6667
Staphylococcus_aureus	Nitrofurantoin	Resistant	6	12	50
Staphylococcus_aureus	Piperacillin	Resistant	6	12	50
Staphylococcus_aureus	Tetracycline	Resistant	12	12	100
Staphylococcus_aureus	Trimethoprimulphate	Resistant	0	12	0
Staphylococcus_aureus	Vancomycin	Resistant	4	12	33.3333
Acinetobacter_baumannii	Amikacin	Sensitive	4	19	21.0526
Acinetobacter_baumannii	Amoxicillin_Clavulanate	Sensitive	1	19	5.26316
Acinetobacter_baumannii	Ampicillin	Sensitive	0	19	0
Acinetobacter_baumannii	Azithromycin	Sensitive	7	19	36.8421
Acinetobacter_baumannii	Aztreonam	Sensitive	6	19	31.5789
Acinetobacter_baumannii	Bacitracin	Sensitive	0	19	0
Acinetobacter_baumannii	Cefalexin	Sensitive	0	19	0
Acinetobacter_baumannii	Cefepime	Sensitive	14	19	73.6842
Acinetobacter_baumannii	Ceftazidim	Sensitive	13	19	68.4211
Acinetobacter_baumannii	Chloramphenicol	Sensitive	5	19	26.3158
Acinetobacter_baumannii	Ciprofloxacin	Sensitive	5	19	26.3158
Acinetobacter_baumannii	Clindamycin	Sensitive	0	19	0
Acinetobacter_baumannii	Colistin	Sensitive	0	19	0
Acinetobacter_baumannii	Imipenem	Sensitive	19	19	100
Acinetobacter_baumannii	Levofloxacin	Sensitive	9	19	47.3684
Acinetobacter_baumannii	Nitrofurantoin	Sensitive	3	19	15.7895
Acinetobacter_baumannii	Piperacillin	Sensitive	0	19	0
Acinetobacter_baumannii	Tetracycline	Sensitive	0	19	0
Acinetobacter_baumannii	Trimethoprimulphate	Sensitive	19	19	100
Acinetobacter_baumannii	Vancomycin	Sensitive	0	19	0
Bacillus_cereus	Amikacin	Sensitive	5	5	100
Bacillus_cereus	Amoxicillin_Clavulanate	Sensitive	5	5	100
Bacillus_cereus	Ampicillin	Sensitive	5	5	100
Bacillus_cereus	Azithromycin	Sensitive	3	5	60
Bacillus_cereus	Aztreonam	Sensitive	0	5	0
Bacillus_cereus	Bacitracin	Sensitive	2	5	40
Bacillus_cereus	Cefalexin	Sensitive	3	5	60
Bacillus_cereus	Cefepime	Sensitive	5	5	100
Bacillus_cereus	Ceftazidim	Sensitive	2	5	40
Bacillus_cereus	Chloramphenicol	Sensitive	5	5	100
Bacillus_cereus	Ciprofloxacin	Sensitive	2	5	40
Bacillus_cereus	Clindamycin	Sensitive	3	5	60
Bacillus_cereus	Colistin	Sensitive	0	5	0
Bacillus_cereus	Imipenem	Sensitive	5	5	100
Bacillus_cereus	Levofloxacin	Sensitive	4	5	80
Bacillus_cereus	Nitrofurantoin	Sensitive	0	5	0
Bacillus_cereus	Piperacillin	Sensitive	5	5	100
Bacillus_cereus	Tetracycline	Sensitive	5	5	100
Bacillus_cereus	Trimethoprimulphate	Sensitive	3	5	60
Bacillus_cereus	Vancomycin	Sensitive	3	5	60
Enterococcus_faecalis	Amikacin	Sensitive	0	15	0
Enterococcus_faecalis	Amoxicillin_Clavulanate	Sensitive	0	15	0
Enterococcus_faecalis	Ampicillin	Sensitive	0	15	0
Enterococcus_faecalis	Azithromycin	Sensitive	2	15	13.3333
Enterococcus_faecalis	Aztreonam	Sensitive	5	15	33.3333
Enterococcus_faecalis	Bacitracin	Sensitive	0	15	0
Enterococcus_faecalis	Cefalexin	Sensitive	2	15	13.3333
Enterococcus_faecalis	Cefepime	Sensitive	4	15	26.6667
Enterococcus_faecalis	Ceftazidim	Sensitive	4	15	26.6667
Enterococcus_faecalis	Chloramphenicol	Sensitive	10	15	66.6667
Enterococcus_faecalis	Ciprofloxacin	Sensitive	5	15	33.3333
Enterococcus_faecalis	Clindamycin	Sensitive	7	15	46.6667
Enterococcus_faecalis	Colistin	Sensitive	0	15	0
Enterococcus_faecalis	Imipenem	Sensitive	12	15	80
Enterococcus_faecalis	Levofloxacin	Sensitive	5	15	33.3333
Enterococcus_faecalis	Nitrofurantoin	Sensitive	6	15	40
Enterococcus_faecalis	Piperacillin	Sensitive	2	15	13.3333
Enterococcus_faecalis	Tetracycline	Sensitive	0	15	0
Enterococcus_faecalis	Trimethoprimulphate	Sensitive	3	15	20
Enterococcus_faecalis	Vancomycin	Sensitive	10	15	66.6667
Escherichia_coli	Amikacin	Sensitive	8	10	80
Escherichia_coli	Amoxicillin_Clavulanate	Sensitive	0	10	0
Escherichia_coli	Ampicillin	Sensitive	0	10	0
Escherichia_coli	Azithromycin	Sensitive	2	10	20
Escherichia_coli	Aztreonam	Sensitive	0	10	0
Escherichia_coli	Bacitracin	Sensitive	0	10	0
Escherichia_coli	Cefalexin	Sensitive	0	10	0
Escherichia_coli	Cefepime	Sensitive	0	10	0
Escherichia_coli	Ceftazidim	Sensitive	2	10	20
Escherichia_coli	Chloramphenicol	Sensitive	10	10	100
Escherichia_coli	Ciprofloxacin	Sensitive	4	10	40
Escherichia_coli	Clindamycin	Sensitive	2	10	20
Escherichia_coli	Colistin	Sensitive	6	10	60
Escherichia_coli	Imipenem	Sensitive	10	10	100
Escherichia_coli	Levofloxacin	Sensitive	8	10	80
Escherichia_coli	Nitrofurantoin	Sensitive	8	10	80
Escherichia_coli	Piperacillin	Sensitive	0	10	0
Escherichia_coli	Tetracycline	Sensitive	0	10	0
Escherichia_coli	Trimethoprimulphate	Sensitive	0	10	0
Escherichia_coli	Vancomycin	Sensitive	0	10	0
Klebsiella_pneumoniae	Amikacin	Sensitive	1	10	10
Klebsiella_pneumoniae	Amoxicillin_Clavulanate	Sensitive	1	10	10
Klebsiella_pneumoniae	Ampicillin	Sensitive	0	10	0
Klebsiella_pneumoniae	Azithromycin	Sensitive	0	10	0
Klebsiella_pneumoniae	Aztreonam	Sensitive	1	10	10
Klebsiella_pneumoniae	Bacitracin	Sensitive	0	10	0
Klebsiella_pneumoniae	Cefalexin	Sensitive	0	10	0
Klebsiella_pneumoniae	Cefepime	Sensitive	0	10	0
Klebsiella_pneumoniae	Ceftazidim	Sensitive	1	10	10
Klebsiella_pneumoniae	Chloramphenicol	Sensitive	2	10	20
Klebsiella_pneumoniae	Ciprofloxacin	Sensitive	0	10	0
Klebsiella_pneumoniae	Clindamycin	Sensitive	1	10	10
Klebsiella_pneumoniae	Colistin	Sensitive	0	10	0
Klebsiella_pneumoniae	Imipenem	Sensitive	6	10	60
Klebsiella_pneumoniae	Levofloxacin	Sensitive	8	10	80
Klebsiella_pneumoniae	Nitrofurantoin	Sensitive	2	10	20
Klebsiella_pneumoniae	Piperacillin	Sensitive	0	10	0
Klebsiella_pneumoniae	Tetracycline	Sensitive	0	10	0
Klebsiella_pneumoniae	Trimethoprimulphate	Sensitive	2	10	20
Klebsiella_pneumoniae	Vancomycin	Sensitive	0	10	0
Listeria_monocytogenes	Amikacin	Sensitive	5	5	100
Listeria_monocytogenes	Amoxicillin_Clavulanate	Sensitive	4	5	80
Listeria_monocytogenes	Ampicillin	Sensitive	2	5	40
Listeria_monocytogenes	Azithromycin	Sensitive	4	5	80
Listeria_monocytogenes	Aztreonam	Sensitive	2	5	40
Listeria_monocytogenes	Bacitracin	Sensitive	4	5	80
Listeria_monocytogenes	Cefalexin	Sensitive	4	5	80
Listeria_monocytogenes	Cefepime	Sensitive	1	5	20
Listeria_monocytogenes	Ceftazidim	Sensitive	2	5	40
Listeria_monocytogenes	Chloramphenicol	Sensitive	5	5	100
Listeria_monocytogenes	Ciprofloxacin	Sensitive	2	5	40
Listeria_monocytogenes	Clindamycin	Sensitive	2	5	40
Listeria_monocytogenes	Colistin	Sensitive	2	5	40
Listeria_monocytogenes	Imipenem	Sensitive	5	5	100
Listeria_monocytogenes	Levofloxacin	Sensitive	5	5	100
Listeria_monocytogenes	Nitrofurantoin	Sensitive	0	5	0
Listeria_monocytogenes	Piperacillin	Sensitive	2	5	40
Listeria_monocytogenes	Tetracycline	Sensitive	5	5	100
Listeria_monocytogenes	Trimethoprimulphate	Sensitive	5	5	100
Listeria_monocytogenes	Vancomycin	Sensitive	3	5	60
Pseudomonas_aeruginosa	Amikacin	Sensitive	3	15	20
Pseudomonas_aeruginosa	Amoxicillin_Clavulanate	Sensitive	0	15	0
Pseudomonas_aeruginosa	Ampicillin	Sensitive	0	15	0
Pseudomonas_aeruginosa	Azithromycin	Sensitive	2	15	13.3333
Pseudomonas_aeruginosa	Aztreonam	Sensitive	9	15	60
Pseudomonas_aeruginosa	Bacitracin	Sensitive	0	15	0
Pseudomonas_aeruginosa	Cefalexin	Sensitive	0	15	0
Pseudomonas_aeruginosa	Cefepime	Sensitive	6	15	40
Pseudomonas_aeruginosa	Ceftazidim	Sensitive	8	15	53.3333
Pseudomonas_aeruginosa	Chloramphenicol	Sensitive	0	15	0
Pseudomonas_aeruginosa	Ciprofloxacin	Sensitive	0	15	0
Pseudomonas_aeruginosa	Clindamycin	Sensitive	15	15	100
Pseudomonas_aeruginosa	Colistin	Sensitive	0	15	0
Pseudomonas_aeruginosa	Imipenem	Sensitive	11	15	73.3333
Pseudomonas_aeruginosa	Levofloxacin	Sensitive	1	15	6.66667
Pseudomonas_aeruginosa	Nitrofurantoin	Sensitive	5	15	33.3333
Pseudomonas_aeruginosa	Piperacillin	Sensitive	9	15	60
Pseudomonas_aeruginosa	Tetracycline	Sensitive	2	15	13.3333
Pseudomonas_aeruginosa	Trimethoprimulphate	Sensitive	0	15	0
Pseudomonas_aeruginosa	Vancomycin	Sensitive	0	15	0
Salmonella_typhi	Amikacin	Sensitive	4	4	100
Salmonella_typhi	Amoxicillin_Clavulanate	Sensitive	0	4	0
Salmonella_typhi	Ampicillin	Sensitive	0	4	0
Salmonella_typhi	Azithromycin	Sensitive	1	4	25
Salmonella_typhi	Aztreonam	Sensitive	4	4	100
Salmonella_typhi	Bacitracin	Sensitive	0	4	0
Salmonella_typhi	Cefalexin	Sensitive	0	4	0
Salmonella_typhi	Cefepime	Sensitive	4	4	100
Salmonella_typhi	Ceftazidim	Sensitive	0	4	0
Salmonella_typhi	Chloramphenicol	Sensitive	1	4	25
Salmonella_typhi	Ciprofloxacin	Sensitive	2	4	50
Salmonella_typhi	Clindamycin	Sensitive	4	4	100
Salmonella_typhi	Colistin	Sensitive	4	4	100
Salmonella_typhi	Imipenem	Sensitive	4	4	100
Salmonella_typhi	Levofloxacin	Sensitive	4	4	100
Salmonella_typhi	Nitrofurantoin	Sensitive	3	4	75
Salmonella_typhi	Piperacillin	Sensitive	2	4	50
Salmonella_typhi	Tetracycline	Sensitive	0	4	0
Salmonella_typhi	Trimethoprimulphate	Sensitive	4	4	100
Salmonella_typhi	Vancomycin	Sensitive	0	4	0
Serratia_marcescens	Amikacin	Sensitive	3	5	60
Serratia_marcescens	Amoxicillin_Clavulanate	Sensitive	5	5	100
Serratia_marcescens	Ampicillin	Sensitive	0	5	0
Serratia_marcescens	Azithromycin	Sensitive	1	5	20
Serratia_marcescens	Aztreonam	Sensitive	0	5	0
Serratia_marcescens	Bacitracin	Sensitive	0	5	0
Serratia_marcescens	Cefalexin	Sensitive	0	5	0
Serratia_marcescens	Cefepime	Sensitive	5	5	100
Serratia_marcescens	Ceftazidim	Sensitive	0	5	0
Serratia_marcescens	Chloramphenicol	Sensitive	4	5	80
Serratia_marcescens	Ciprofloxacin	Sensitive	4	5	80
Serratia_marcescens	Clindamycin	Sensitive	4	5	80
Serratia_marcescens	Colistin	Sensitive	0	5	0
Serratia_marcescens	Imipenem	Sensitive	5	5	100
Serratia_marcescens	Levofloxacin	Sensitive	5	5	100
Serratia_marcescens	Nitrofurantoin	Sensitive	2	5	40
Serratia_marcescens	Piperacillin	Sensitive	5	5	100
Serratia_marcescens	Tetracycline	Sensitive	0	5	0
Serratia_marcescens	Trimethoprimulphate	Sensitive	5	5	100
Serratia_marcescens	Vancomycin	Sensitive	0	5	0
Staphylococcus_aureus	Amikacin	Sensitive	4	12	33.3333
Staphylococcus_aureus	Amoxicillin_Clavulanate	Sensitive	1	12	8.33333
Staphylococcus_aureus	Ampicillin	Sensitive	0	12	0
Staphylococcus_aureus	Azithromycin	Sensitive	0	12	0
Staphylococcus_aureus	Aztreonam	Sensitive	0	12	0
Staphylococcus_aureus	Bacitracin	Sensitive	4	12	33.3333
Staphylococcus_aureus	Cefalexin	Sensitive	3	12	25
Staphylococcus_aureus	Cefepime	Sensitive	5	12	41.6667
Staphylococcus_aureus	Ceftazidim	Sensitive	2	12	16.6667
Staphylococcus_aureus	Chloramphenicol	Sensitive	10	12	83.3333
Staphylococcus_aureus	Ciprofloxacin	Sensitive	0	12	0
Staphylococcus_aureus	Clindamycin	Sensitive	4	12	33.3333
Staphylococcus_aureus	Colistin	Sensitive	0	12	0
Staphylococcus_aureus	Imipenem	Sensitive	12	12	100
Staphylococcus_aureus	Levofloxacin	Sensitive	6	12	50
Staphylococcus_aureus	Nitrofurantoin	Sensitive	4	12	33.3333
Staphylococcus_aureus	Piperacillin	Sensitive	6	12	50
Staphylococcus_aureus	Tetracycline	Sensitive	0	12	0
Staphylococcus_aureus	Trimethoprimulphate	Sensitive	12	12	100
Staphylococcus_aureus	Vancomycin	Sensitive	6	12	50

## Sheet: S_Table3
Supplementary Table 3: Antibiotic Susceptibility Patterns and Statistical Analysis of Bacterial Isolates
Bacterial Species	Escherichia coli				Klebsiella pneumoniae				Pseudomonas aeruginosa				Acinetobacter baumannii				Salmonella typhi				Serratia marcescens				Salmonella typhi				Serratia marcescens				Staphylococcus aureus				Enterococcous faecalies				Listeria monocytogenes				Bacillus cereuse
Antibiotic susceptibility Patterns	S%	I%	R%	P value	S%	I%	R%	P value	S%	I%	R%	P value	S%	I%	R%	P value	S%	I%	R%	P value	S%	I%	R%	P value	S%	I%	R%	P value	S%	I%	R%	P value	S%	I%	R%	P value	S%	I%	R%	P value	S%	I%	R%	P value	S%	I%	R%	P value
Antibiotics
Amikacin	80	0	20	0.058	10	20	70	0.045*	20	26.67	53.33	0.247	21.05	21.05	57.89	0.076	100	0	0	-	60	0	40	0.655	100	0	0	-	60	0	40	0.655	33.33	16.67	50	0.368	0	0	100	-	100	0	0	-	100	0	0	-
Amoxicillin_Clavulanate	0	20	80	0.058	10	0	90	0.011*	0	6.67	93.33	0.001*	5.26	0	94.74	0.000096*	0	25	75	0.317	100	0	0	-	0	25	75	0.317	100	0	0	-	8.33	16.67	75	0.009*	0	26.67	73.33	0.071*	80	0	20	0.18	100	0	0	-
Ampicillin	0	0	100	-	0	0	100	-	0	0	100	-	0	0	100	-	0	50	50	1	0	40	60	0.655	0	50	50	1	0	40	60	0.655	0	8.33	91.67	0.004*	0	0	100	-	40	20	40	0.819	100	0	0	-
Azithromycin	20	20	60	0.202	0	20	80	0.058	13.33	33.33	53.33	0.165	36.84	26.32	36.84	0.81	25	50	25	0.779	20	20	60	0.449	25	50	25	0.779	20	20	60	0.449	0	33.33	66.67	0.248	13.33	0	86.67	0.005*	80	0	20	0.18	60	40	0	0.655
Aztreonam	0	20	80	0.058	10	30	60	0.15	60	0	40	0.439	31.58	0	68.42	0.108	100	0	0	-	0	40	60	0.655	100	0	0	-	0	40	60	0.655	0	16.67	83.33	0.021*	33.33	0	66.67	0.197	40	20	40	0.819	0	0	100	-
Bacitracin	0	0	100	-	0	0	100	-	0	0	100	-	0	0	100	-	0	0	100	-	0	0	100	-	0	0	100	-	0	0	100	-	33.33	0	66.67	0.248	0	13.33	86.67	0.005*	80	0	20	0.18	40	0	60	0.655
Cefalexin	0	0	100	-	0	0	100	-	0	0	100	-	0	0	100	-	0	0	100	-	0	0	100	-	0	0	100	-	0	0	100	-	25	0	75	0.083	13.33	20	66.67	0.022*	80	20	0	0.18	60	0	40	0.655
Cefepime	0	0	100	-	0	0	100	-	40	6.67	53.33	0.074	73.68	0	26.32	0.039*	100	0	0	-	100	0	0	-	100	0	0	-	100	0	0	-	41.67	8.33	50	0.174	26.67	0	73.33	0.071*	20	40	40	0.819	100	0	0	-
Ceftazidim	20	0	80	0.058	10	0	90	0.011*	53.33	13.33	33.33	0.165	68.42	0	31.58	0.108	0	0	100	-	0	60	40	0.655	0	0	100	-	0	60	40	0.655	16.67	0	83.33	0.021*	26.67	6.67	66.67	0.015*	40	0	60	0.655	40	0	60	0.655
Chloramphenicol	100	0	0	-	20	0	80	0.058	0	46.67	53.33	0.796	26.32	10.52	63.16	0.016	25	25	50	0.779	80	0	20	0.18	25	25	50	0.779	80	0	20	0.18	83.33	16.67	0	0.021*	66.67	0	33.33	0.197	100	0	0	-	100	0	0	-
Ciprofloxacin	40	0	60	0.527	0	0	100	-	0	0	100	-	26.32	26.31	47.37	0.431	50	0	50	1	80	0	20	0.18	50	0	50	1	80	0	20	0.18	0	33.33	66.67	0.248	33.33	13.33	53.33	0.165	40	0	60	0.655	40	40	20	0.819
Clindamycin	20	10	70	0.045*	10	20	70	0.045*	100	0	0	-	0	0	100	-	100	0	0	-	80	20	0	0.18	100	0	0	-	80	20	0	0.18	33.33	16.67	50	0.368	46.67	0	53.33	0.796	40	20	40	0.819	60	0	40	0.655
Colistin	60	20	20	0.202	0	0	100	-	0	0	100	-	0	0	100	-	100	0	0	-	0	0	100	-	100	0	0	-	0	0	100	-	0	0	100	-	0	13.33	86.67	0.005*	40	20	40	0.819	0	40	60	0.655
Imipenem	100	0	0	-	60	20	20	0.202	73.33	0	26.67	0.071	100	0	0	-	100	0	0	-	100	0	0	-	100	0	0	-	100	0	0	-	100	0	0	-	80	13.33	6.67	0.005*	100	0	0	-	100	0	0	-
Levofloxacin	80	0	20	0.058	80	0	20	0.058	6.67	33.33	60	0.041*	47.37	10.53	42.1	0.104	100	0	0	-	100	0	0	-	100	0	0	-	100	0	0	-	50	33.33	16.67	0.368	33.33	20	46.67	0.449	100	0	0	-	80	20	0	0.18
Nitrofurantoin	80	20	0	0.058	20	20	60	0.202	33.33	6.67	60	0.041*	15.79	10.53	73.68	0.001*	75	25	0	0.317	40	60	0	0.655	75	25	0	0.317	40	60	0	0.655	33.33	16.67	50	0.368	40	20	40	0.549	0	0	100	-	0	0	100	-
piperacillin	0	0	100	-	0	0	100	-	60	6.67	33.33	0.041*	0	0	100	-	50	50	0	1	100	0	0	-	50	50	0	1	100	0	0	-	50	0	50	1	13.33	13.33	73.33	0.005*	40	40	20	0.819	100	0	0	-
Tetracycline	0	0	100	-	0	0	100	-	13.33	13.33	73.33	0.005*	0	0	100	-	0	0	100	-	0	0	100	-	0	0	100	-	0	0	100	-	0	0	100	-	0	0	100	-	100	0	0	-	100	0	0	-
Trimethoprim_Sulphate	0	0	100	-	20	10	70	0.045*	0	0	100	-	100	0	0	-	100	0	0	-	100	0	0	-	100	0	0	-	100	0	0	-	100	0	0	-	20	0	80	0.020*	100	0	0	-	60	40	0	0.655
Vancomycin	0	0	100	-	0	0	100	-	0	0	100	-	0	0	100	-	0	0	100	-	0	0	100	-	0	0	100	-	0	0	100	-	50	16.67	33.33	0.368	66.67	0	33.33	0.197	60	0	40	0.655	60	0	40	0.655
* Lower than significant level with P value ≤0.05
S=Sensistive, R=Resistnce, I=Intermediate

## Sheet: S_Table4
Supplementary Table 4: Antibiotic Resistance Profiles of Bacterial Isolates Based on a ≥50% Resistance Threshold
Bacterial_Species	Antibiotics	Antibiotic_Class	Resistance Percentage	Resistance_Category ≥ 50%
Acinetobacter_baumannii	Amikacin	Aminoglycosides	57.89	Resistant
Enterococcus_faecalis	Amikacin	Aminoglycosides	100	Resistant
Klebsiella_pneumoniae	Amikacin	Aminoglycosides	70	Resistant
Acinetobacter_baumannii	Azithromycin	Macrolides	36.84	Not Resistant
Pseudomonas_aeruginosa	Amikacin	Aminoglycosides	53.33	Resistant
Staphylococcus_aureus	Amikacin	Aminoglycosides	50	Resistant
Acinetobacter_baumannii	Amoxicillin_Clavulanate	Beta-lactams: Penicillins	94.74	Resistant
Acinetobacter_baumannii	Cefepime	Beta-lactams: Cephalosporins	26.32	Not Resistant
Acinetobacter_baumannii	Ceftazidim	Beta-lactams: Cephalosporins	31.58	Not Resistant
Enterococcus_faecalis	Amoxicillin_Clavulanate	Beta-lactams: Penicillins	73.33	Resistant
Acinetobacter_baumannii	Ciprofloxacin	Fluoroquinolones	47.37	Not Resistant
Escherichia_coli	Amoxicillin_Clavulanate	Beta-lactams: Penicillins	80	Resistant
Klebsiella_pneumoniae	Amoxicillin_Clavulanate	Beta-lactams: Penicillins	90	Resistant
Acinetobacter_baumannii	Imipenem	Beta-lactams: Carbapenems	0	Not Resistant
Acinetobacter_baumannii	Levofloxacin	Fluoroquinolones	42.11	Not Resistant
Pseudomonas_aeruginosa	Amoxicillin_Clavulanate	Beta-lactams: Penicillins	93.33	Resistant
Salmonella_typhi	Amoxicillin_Clavulanate	Beta-lactams: Penicillins	75	Resistant
Staphylococcus_aureus	Amoxicillin_Clavulanate	Beta-lactams: Penicillins	75	Resistant
Acinetobacter_baumannii	Trimethoprimulphate	Sulfonamides	0	Not Resistant
Acinetobacter_baumannii	Ampicillin	Beta-lactams: Penicillins	100	Resistant
Bacillus_cereus	Amikacin	Aminoglycosides	0	Not Resistant
Bacillus_cereus	Amoxicillin_Clavulanate	Beta-lactams: Penicillins	0	Not Resistant
Bacillus_cereus	Ampicillin	Beta-lactams: Penicillins	0	Not Resistant
Bacillus_cereus	Azithromycin	Macrolides	0	Not Resistant
Enterococcus_faecalis	Ampicillin	Beta-lactams: Penicillins	100	Resistant
Escherichia_coli	Ampicillin	Beta-lactams: Penicillins	100	Resistant
Bacillus_cereus	Cefalexin	Beta-lactams: Cephalosporins	40	Not Resistant
Bacillus_cereus	Cefepime	Beta-lactams: Cephalosporins	0	Not Resistant
Klebsiella_pneumoniae	Ampicillin	Beta-lactams: Penicillins	100	Resistant
Bacillus_cereus	Chloramphenicol	Chloramphenicol	0	Not Resistant
Bacillus_cereus	Ciprofloxacin	Fluoroquinolones	20	Not Resistant
Bacillus_cereus	Clindamycin	Lincosamides	40	Not Resistant
Pseudomonas_aeruginosa	Ampicillin	Beta-lactams: Penicillins	100	Resistant
Bacillus_cereus	Imipenem	Beta-lactams: Carbapenems	0	Not Resistant
Bacillus_cereus	Levofloxacin	Fluoroquinolones	0	Not Resistant
Salmonella_typhi	Ampicillin	Beta-lactams: Penicillins	50	Resistant
Bacillus_cereus	Piperacillin	Beta-lactams: Penicillins	0	Not Resistant
Bacillus_cereus	Tetracycline	Tetracyclines	0	Not Resistant
Bacillus_cereus	Trimethoprimulphate	Sulfonamides	0	Not Resistant
Bacillus_cereus	Vancomycin	Glycopeptides	40	Not Resistant
Serratia_marcescens	Ampicillin	Beta-lactams: Penicillins	60	Resistant
Staphylococcus_aureus	Ampicillin	Beta-lactams: Penicillins	91.67	Resistant
Enterococcus_faecalis	Azithromycin	Macrolides	86.67	Resistant
Escherichia_coli	Azithromycin	Macrolides	60	Resistant
Klebsiella_pneumoniae	Azithromycin	Macrolides	80	Resistant
Pseudomonas_aeruginosa	Azithromycin	Macrolides	53.33	Resistant
Serratia_marcescens	Azithromycin	Macrolides	60	Resistant
Staphylococcus_aureus	Azithromycin	Macrolides	66.67	Resistant
Acinetobacter_baumannii	Aztreonam	Beta-lactams: Monobactams	68.42	Resistant
Enterococcus_faecalis	Chloramphenicol	Chloramphenicol	33.33	Not Resistant
Bacillus_cereus	Aztreonam	Beta-lactams: Monobactams	100	Resistant
Enterococcus_faecalis	Aztreonam	Beta-lactams: Monobactams	66.67	Resistant
Escherichia_coli	Aztreonam	Beta-lactams: Monobactams	80	Resistant
Enterococcus_faecalis	Imipenem	Beta-lactams: Carbapenems	6.67	Not Resistant
Enterococcus_faecalis	Levofloxacin	Fluoroquinolones	46.67	Not Resistant
Enterococcus_faecalis	Nitrofurantoin	Nitrofurans	40	Not Resistant
Klebsiella_pneumoniae	Aztreonam	Beta-lactams: Monobactams	60	Resistant
Serratia_marcescens	Aztreonam	Beta-lactams: Monobactams	60	Resistant
Staphylococcus_aureus	Aztreonam	Beta-lactams: Monobactams	83.33	Resistant
Enterococcus_faecalis	Vancomycin	Glycopeptides	33.33	Not Resistant
Escherichia_coli	Amikacin	Aminoglycosides	20	Not Resistant
Acinetobacter_baumannii	Bacitracin	Other	100	Resistant
Bacillus_cereus	Bacitracin	Other	60	Resistant
Enterococcus_faecalis	Bacitracin	Other	86.67	Resistant
Escherichia_coli	Bacitracin	Other	100	Resistant
Klebsiella_pneumoniae	Bacitracin	Other	100	Resistant
Pseudomonas_aeruginosa	Bacitracin	Other	100	Resistant
Salmonella_typhi	Bacitracin	Other	100	Resistant
Serratia_marcescens	Bacitracin	Other	100	Resistant
Escherichia_coli	Chloramphenicol	Chloramphenicol	0	Not Resistant
Staphylococcus_aureus	Bacitracin	Other	66.67	Resistant
Acinetobacter_baumannii	Cefalexin	Beta-lactams: Cephalosporins	100	Resistant
Escherichia_coli	Colistin	Polymyxins	20	Not Resistant
Escherichia_coli	Imipenem	Beta-lactams: Carbapenems	0	Not Resistant
Escherichia_coli	Levofloxacin	Fluoroquinolones	20	Not Resistant
Escherichia_coli	Nitrofurantoin	Nitrofurans	0	Not Resistant
Enterococcus_faecalis	Cefalexin	Beta-lactams: Cephalosporins	66.67	Resistant
Escherichia_coli	Cefalexin	Beta-lactams: Cephalosporins	100	Resistant
Klebsiella_pneumoniae	Cefalexin	Beta-lactams: Cephalosporins	100	Resistant
Pseudomonas_aeruginosa	Cefalexin	Beta-lactams: Cephalosporins	100	Resistant
Salmonella_typhi	Cefalexin	Beta-lactams: Cephalosporins	100	Resistant
Serratia_marcescens	Cefalexin	Beta-lactams: Cephalosporins	100	Resistant
Staphylococcus_aureus	Cefalexin	Beta-lactams: Cephalosporins	75	Resistant
Enterococcus_faecalis	Cefepime	Beta-lactams: Cephalosporins	73.33	Resistant
Escherichia_coli	Cefepime	Beta-lactams: Cephalosporins	100	Resistant
Klebsiella_pneumoniae	Cefepime	Beta-lactams: Cephalosporins	100	Resistant
Pseudomonas_aeruginosa	Cefepime	Beta-lactams: Cephalosporins	53.33	Resistant
Staphylococcus_aureus	Cefepime	Beta-lactams: Cephalosporins	50	Resistant
Bacillus_cereus	Ceftazidim	Beta-lactams: Cephalosporins	60	Resistant
Enterococcus_faecalis	Ceftazidim	Beta-lactams: Cephalosporins	66.67	Resistant
Escherichia_coli	Ceftazidim	Beta-lactams: Cephalosporins	80	Resistant
Klebsiella_pneumoniae	Ceftazidim	Beta-lactams: Cephalosporins	90	Resistant
Listeria_monocytogenes	Ceftazidim	Beta-lactams: Cephalosporins	60	Resistant
Klebsiella_pneumoniae	Imipenem	Beta-lactams: Carbapenems	20	Not Resistant
Klebsiella_pneumoniae	Levofloxacin	Fluoroquinolones	20	Not Resistant
Salmonella_typhi	Ceftazidim	Beta-lactams: Cephalosporins	100	Resistant
Staphylococcus_aureus	Ceftazidim	Beta-lactams: Cephalosporins	83.33	Resistant
Acinetobacter_baumannii	Chloramphenicol	Chloramphenicol	63.16	Resistant
Klebsiella_pneumoniae	Chloramphenicol	Chloramphenicol	80	Resistant
Pseudomonas_aeruginosa	Chloramphenicol	Chloramphenicol	53.33	Resistant
Listeria_monocytogenes	Amikacin	Aminoglycosides	0	Not Resistant
Listeria_monocytogenes	Amoxicillin_Clavulanate	Beta-lactams: Penicillins	20	Not Resistant
Listeria_monocytogenes	Ampicillin	Beta-lactams: Penicillins	40	Not Resistant
Listeria_monocytogenes	Azithromycin	Macrolides	20	Not Resistant
Listeria_monocytogenes	Aztreonam	Beta-lactams: Monobactams	40	Not Resistant
Listeria_monocytogenes	Bacitracin	Other	20	Not Resistant
Listeria_monocytogenes	Cefalexin	Beta-lactams: Cephalosporins	0	Not Resistant
Listeria_monocytogenes	Cefepime	Beta-lactams: Cephalosporins	40	Not Resistant
Salmonella_typhi	Chloramphenicol	Chloramphenicol	50	Resistant
Listeria_monocytogenes	Chloramphenicol	Chloramphenicol	0	Not Resistant
Enterococcus_faecalis	Ciprofloxacin	Fluoroquinolones	53.33	Resistant
Listeria_monocytogenes	Clindamycin	Lincosamides	40	Not Resistant
Listeria_monocytogenes	Colistin	Polymyxins	40	Not Resistant
Listeria_monocytogenes	Imipenem	Beta-lactams: Carbapenems	0	Not Resistant
Listeria_monocytogenes	Levofloxacin	Fluoroquinolones	0	Not Resistant
Escherichia_coli	Ciprofloxacin	Fluoroquinolones	60	Resistant
Listeria_monocytogenes	Piperacillin	Beta-lactams: Penicillins	20	Not Resistant
Listeria_monocytogenes	Tetracycline	Tetracyclines	0	Not Resistant
Listeria_monocytogenes	Trimethoprimulphate	Sulfonamides	0	Not Resistant
Listeria_monocytogenes	Vancomycin	Glycopeptides	40	Not Resistant
Klebsiella_pneumoniae	Ciprofloxacin	Fluoroquinolones	100	Resistant
Listeria_monocytogenes	Ciprofloxacin	Fluoroquinolones	60	Resistant
Pseudomonas_aeruginosa	Ciprofloxacin	Fluoroquinolones	100	Resistant
Salmonella_typhi	Ciprofloxacin	Fluoroquinolones	50	Resistant
Pseudomonas_aeruginosa	Aztreonam	Beta-lactams: Monobactams	40	Not Resistant
Staphylococcus_aureus	Ciprofloxacin	Fluoroquinolones	66.67	Resistant
Acinetobacter_baumannii	Clindamycin	Lincosamides	100	Resistant
Enterococcus_faecalis	Clindamycin	Lincosamides	53.33	Resistant
Pseudomonas_aeruginosa	Ceftazidim	Beta-lactams: Cephalosporins	33.33	Not Resistant
Escherichia_coli	Clindamycin	Lincosamides	70	Resistant
Klebsiella_pneumoniae	Clindamycin	Lincosamides	70	Resistant
Pseudomonas_aeruginosa	Clindamycin	Lincosamides	6.67	Not Resistant
Staphylococcus_aureus	Clindamycin	Lincosamides	50	Resistant
Pseudomonas_aeruginosa	Imipenem	Beta-lactams: Carbapenems	26.67	Not Resistant
Acinetobacter_baumannii	Colistin	Polymyxins	100	Resistant
Bacillus_cereus	Colistin	Polymyxins	60	Resistant
Pseudomonas_aeruginosa	Piperacillin	Beta-lactams: Penicillins	26.67	Not Resistant
Enterococcus_faecalis	Colistin	Polymyxins	86.67	Resistant
Klebsiella_pneumoniae	Colistin	Polymyxins	100	Resistant
Pseudomonas_aeruginosa	Colistin	Polymyxins	100	Resistant
Salmonella_typhi	Amikacin	Aminoglycosides	0	Not Resistant
Serratia_marcescens	Colistin	Polymyxins	100	Resistant
Staphylococcus_aureus	Colistin	Polymyxins	100	Resistant
Salmonella_typhi	Azithromycin	Macrolides	25	Not Resistant
Salmonella_typhi	Aztreonam	Beta-lactams: Monobactams	0	Not Resistant
Pseudomonas_aeruginosa	Levofloxacin	Fluoroquinolones	60	Resistant
Acinetobacter_baumannii	Nitrofurantoin	Nitrofurans	73.68	Resistant
Salmonella_typhi	Cefepime	Beta-lactams: Cephalosporins	0	Not Resistant
Bacillus_cereus	Nitrofurantoin	Nitrofurans	100	Resistant
Klebsiella_pneumoniae	Nitrofurantoin	Nitrofurans	60	Resistant
Listeria_monocytogenes	Nitrofurantoin	Nitrofurans	100	Resistant
Salmonella_typhi	Clindamycin	Lincosamides	0	Not Resistant
Salmonella_typhi	Colistin	Polymyxins	0	Not Resistant
Salmonella_typhi	Imipenem	Beta-lactams: Carbapenems	0	Not Resistant
Salmonella_typhi	Levofloxacin	Fluoroquinolones	0	Not Resistant
Salmonella_typhi	Nitrofurantoin	Nitrofurans	0	Not Resistant
Salmonella_typhi	Piperacillin	Beta-lactams: Penicillins	0	Not Resistant
Pseudomonas_aeruginosa	Nitrofurantoin	Nitrofurans	60	Resistant
Salmonella_typhi	Trimethoprimulphate	Sulfonamides	0	Not Resistant
Staphylococcus_aureus	Nitrofurantoin	Nitrofurans	50	Resistant
Serratia_marcescens	Amikacin	Aminoglycosides	40	Not Resistant
Serratia_marcescens	Amoxicillin_Clavulanate	Beta-lactams: Penicillins	0	Not Resistant
Acinetobacter_baumannii	Piperacillin	Beta-lactams: Penicillins	100	Resistant
Enterococcus_faecalis	Piperacillin	Beta-lactams: Penicillins	73.33	Resistant
Escherichia_coli	Piperacillin	Beta-lactams: Penicillins	100	Resistant
Klebsiella_pneumoniae	Piperacillin	Beta-lactams: Penicillins	100	Resistant
Staphylococcus_aureus	Piperacillin	Beta-lactams: Penicillins	50	Resistant
Serratia_marcescens	Cefepime	Beta-lactams: Cephalosporins	0	Not Resistant
Serratia_marcescens	Ceftazidim	Beta-lactams: Cephalosporins	40	Not Resistant
Serratia_marcescens	Chloramphenicol	Chloramphenicol	20	Not Resistant
Serratia_marcescens	Ciprofloxacin	Fluoroquinolones	20	Not Resistant
Serratia_marcescens	Clindamycin	Lincosamides	0	Not Resistant
Acinetobacter_baumannii	Tetracycline	Tetracyclines	100	Resistant
Serratia_marcescens	Imipenem	Beta-lactams: Carbapenems	0	Not Resistant
Serratia_marcescens	Levofloxacin	Fluoroquinolones	0	Not Resistant
Serratia_marcescens	Nitrofurantoin	Nitrofurans	0	Not Resistant
Serratia_marcescens	Piperacillin	Beta-lactams: Penicillins	0	Not Resistant
Enterococcus_faecalis	Tetracycline	Tetracyclines	100	Resistant
Serratia_marcescens	Trimethoprimulphate	Sulfonamides	0	Not Resistant
Escherichia_coli	Tetracycline	Tetracyclines	100	Resistant
Klebsiella_pneumoniae	Tetracycline	Tetracyclines	100	Resistant
Pseudomonas_aeruginosa	Tetracycline	Tetracyclines	73.33	Resistant
Salmonella_typhi	Tetracycline	Tetracyclines	100	Resistant
Serratia_marcescens	Tetracycline	Tetracyclines	100	Resistant
Staphylococcus_aureus	Tetracycline	Tetracyclines	100	Resistant
Enterococcus_faecalis	Trimethoprimulphate	Sulfonamides	80	Resistant
Escherichia_coli	Trimethoprimulphate	Sulfonamides	100	Resistant
Klebsiella_pneumoniae	Trimethoprimulphate	Sulfonamides	70	Resistant
Pseudomonas_aeruginosa	Trimethoprimulphate	Sulfonamides	100	Resistant
Staphylococcus_aureus	Chloramphenicol	Chloramphenicol	0	Not Resistant
Acinetobacter_baumannii	Vancomycin	Glycopeptides	100	Resistant
Escherichia_coli	Vancomycin	Glycopeptides	100	Resistant
Klebsiella_pneumoniae	Vancomycin	Glycopeptides	100	Resistant
Staphylococcus_aureus	Imipenem	Beta-lactams: Carbapenems	0	Not Resistant
Staphylococcus_aureus	Levofloxacin	Fluoroquinolones	16.67	Not Resistant
Pseudomonas_aeruginosa	Vancomycin	Glycopeptides	100	Resistant
Salmonella_typhi	Vancomycin	Glycopeptides	100	Resistant
Serratia_marcescens	Vancomycin	Glycopeptides	100	Resistant
Staphylococcus_aureus	Trimethoprimulphate	Sulfonamides	0	Not Resistant
Staphylococcus_aureus	Vancomycin	Glycopeptides	33.33	Not Resistant

## Sheet: S_Table5
Supplementary Table 5: Multidrug Resistance (MDR) Classification of Bacterial Isolates Based on Antibiotic Class Resistance
No	Bacterial_Species	No of Antibiotics Resistant_Classes	MDR	Reason
1	Acinetobacter_baumannii	13	Yes	Restistant to > 3 classes of antimicrobial tested
2	Bacillus_cereus	5	Yes	Restistant to > 3 classes of antimicrobial tested
3	Enterococcus_faecalis	15	Yes	Restistant to > 3 classes of antimicrobial tested
4	Escherichia_coli	14	Yes	Restistant to > 3 classes of antimicrobial tested
5	Klebsiella_pneumoniae	18	Yes	Restistant to > 3 classes of antimicrobial tested
6	Listeria_monocytogenes	3	Yes	Restistant to > 3 classes of antimicrobial tested
7	Pseudomonas_aeruginosa	15	Yes	Restistant to > 3 classes of antimicrobial tested
8	Salmonella_typhi	9	Yes	Restistant to > 3 classes of antimicrobial tested
9	Serratia_marcescens	8	Yes	Restistant to > 3 classes of antimicrobial tested
10	Staphylococcus_aureus	15	Yes	Restistant to > 3 classes of antimicrobial tested

## Sheet: S_Table6
Supplementary Table 6:Synergistic Effect and Statistical Analysis of Antibiotics Alone and in Combination with AgNPs, Including Mean Values, Standard Deviations, and Fold Increase
Antibotics	Tetracycline				Colistin				Cefepime				Ceftazidime				Nitrofurantoin				Chloramphenicol				Ampicillin				Gentamicin				Erythromycin				Ciprofloxacin
Bacterial_Species	Antibiotic	Antibiotic + AgNPs	Fold Increase	P-value	Antibiotic	Antibiotic + AgNPs	Fold Increase	P-value	Antibiotic	Antibiotic + AgNPs	Fold Increase	P-value	Antibiotic	Antibiotic + AgNPs	Fold Increase	P-value	Antibiotic	Antibiotic + AgNPs	Fold Increase	P-value	Antibiotic	Antibiotic + AgNPs	Fold Increase	P-value	Antibiotic	Antibiotic + AgNPs	Fold Increase	P-value	Antibiotic	Antibiotic + AgNPs	Fold Increase	P-value	Antibiotic	Antibiotic + AgNPs	Fold Increase	P-value	Antibiotic	Antibiotic + AgNPs	Fold Increase	P-value
Listeria monocytogenes	5.2 ± 0.45	18.4 ± 2.07	11.89 ± 3.61	0.0567594	9.8 ± 0.45	19.2 ± 1.1	2.85 ± 0.34	0.0477149	10.2 ± 0.45	23.6 ± 2.19	4.39 ± 0.93	0.0579073	9.6 ± 0.55	19.4 ± 0.89	3.09 ± 0.2	0.0477149	5.6 ± 0.55	13 ± 0.71	4.47 ± 0.86	0.0579073	9.6 ± 0.55	20.8 ± 1.1	3.71 ± 0.4	0.0567594	18.4 ± 0.55	24 ± 1.22	0.71 ± 0.21	0.0567594	16.2 ± 0.45	25.8 ± 2.39	1.56 ± 0.55	0.0579073	17.6 ± 0.55	23.2 ± 1.64	0.75 ± 0.29	0.0579073	24.4 ± 0.89	28.6 ± 0.89	0.38 ± 0.09	0.0590582
Enterococcus faecalis	9.93 ± 0.59	18.8 ± 2.46	2.61 ± 0.78	0.0007034	4.73 ± 0.46	15.2 ± 3.49	9.84 ± 4.53	0.0007016	9.67 ± 0.49	19.87 ± 1.41	3.25 ± 0.6	0.0006928	4.53 ± 0.52	9.93 ± 1.22	4.17 ± 2.21	0.0006653	12.53 ± 0.64	19.47 ± 1.46	1.44 ± 0.42	0.0006859	8.8 ± 0.41	15.27 ± 1.67	2.05 ± 0.69	0.0006603	5.4 ± 0.51	11.13 ± 1.96	3.54 ± 2.08	0.0006998	11.67 ± 0.49	18.73 ± 2.19	1.62 ± 0.54	0.0010092	18.33 ± 0.72	25.73 ± 3.53	0.99 ± 0.47	0.0006981	19.33 ± 0.82	23.53 ± 1.36	0.49 ± 0.16	0.0006824
Bacillus cereus	6.4 ± 0.55	19.4 ± 0.55	8.34 ± 1.53	0.0579073	9.6 ± 0.55	23.8 ± 2.17	5.16 ± 0.78	0.054474	9.8 ± 0.45	25.8 ± 4.55	5.99 ± 1.97	0.0567594	8.4 ± 0.55	14.6 ± 0.55	2.04 ± 0.3	0.0567594	7.8 ± 0.45	12.6 ± 1.34	1.64 ± 0.57	0.054474	14.4 ± 0.55	24.8 ± 2.86	1.98 ± 0.53	0.0567594	16.6 ± 0.55	19.4 ± 0.55	0.37 ± 0.13	0.0579073	17.8 ± 0.45	22.2 ± 2.17	0.56 ± 0.27	0.0579073	17.6 ± 0.55	20.2 ± 1.1	0.32 ± 0.12	0.0579073	19.6 ± 0.55	26.6 ± 2.19	0.85 ± 0.24	0.0567594
Serratia marcescens	9.6 ± 0.55	28.2 ± 1.92	7.64 ± 0.74	0.0579073	9.4 ± 0.55	28 ± 2.74	7.91 ± 1.39	0.0567594	10.8 ± 0.45	19.4 ± 0.55	2.24 ± 0.26	0.0567594	15 ± 0	19.2 ± 0.84	0.64 ± 0.14	0.0567594	9.6 ± 0.55	17.6 ± 1.67	2.46 ± 1.02	0.0579073	14.4 ± 0.89	19.4 ± 0.89	0.82 ± 0.06	0.054474	26.2 ± 1.1	30.8 ± 2.39	0.39 ± 0.21	0.0579073	11.6 ± 0.55	22.2 ± 1.79	2.67 ± 0.47	0.0579073	19.6 ± 0.55	24.6 ± 0.55	0.58 ± 0.1	0.0579073	19.8 ± 0.45	26.2 ± 3.27	0.76 ± 0.39	0.0579073
Acinetobacter baumannii	18.58 ± 0.51	22 ± 1.67	0.41 ± 0.21	0.0001363	10.31 ± 0.48	23.62 ± 1.54	4.32 ± 0.94	0.0004317	9.89 ± 0.57	17.16 ± 1.61	2.03 ± 0.51	0.0001373	8.37 ± 0.5	20.21 ± 3.01	5.11 ± 2.24	0.0001384	10.39 ± 0.5	17.22 ± 2.05	1.77 ± 0.53	0.0001982	19.58 ± 0.51	23.47 ± 1.43	0.44 ± 0.18	0.0001365	14.68 ± 0.48	21.47 ± 2.25	1.16 ± 0.42	0.0001369	17.58 ± 0.51	21.89 ± 1.63	0.56 ± 0.25	0.0001371	19.32 ± 0.82	22.89 ± 1.97	0.41 ± 0.19	0.0001365	20 ± 1.05	24.21 ± 1.78	0.47 ± 0.17	0.0001369
Salmonella typhi	11.75 ± 0.5	27.5 ± 2.89	4.5 ± 0.93	0.0975125	9 ± 0	21.75 ± 3.77	4.97 ± 2.02	0.0975125	10 ± 0	21 ± 1.15	3.42 ± 0.48	0.0946707	9.75 ± 0.5	21 ± 1.15	3.7 ± 0.94	0.0975125	11.5 ± 0.58	18.5 ± 1	1.6 ± 0.26	0.0975125	12 ± 0	19.5 ± 0.58	1.64 ± 0.16	0.0946707	9.5 ± 0.58	14.5 ± 0.58	1.35 ± 0.34	0.100348	15.75 ± 0.5	19.75 ± 0.5	0.58 ± 0.15	0.0975125	14.5 ± 0.58	20 ± 0	0.91 ± 0.15	0.0946707	24.75 ± 0.5	29.5 ± 1.91	0.42 ± 0.16	0.100348
Staphylococcus aureus	11.42 ± 0.67	22.17 ± 1.59	2.82 ± 0.7	0.0023928	7.58 ± 0.51	17.75 ± 1.82	4.57 ± 1.22	0.0024589	14.58 ± 0.51	20.75 ± 1.96	1.04 ± 0.4	0.0024972	7.08 ± 0.67	15.42 ± 1.56	3.92 ± 1.56	0.0024115	9.67 ± 0.49	15.5 ± 1.88	1.62 ± 0.72	0.0024304	7.83 ± 0.58	14 ± 0.85	2.25 ± 0.57	0.0023834	14.58 ± 0.51	19.33 ± 1.15	0.77 ± 0.27	0.0024684	14.58 ± 0.51	18.67 ± 1.15	0.66 ± 0.27	0.0024589	17.33 ± 0.78	25.75 ± 3.52	1.22 ± 0.48	0.0024021	19.42 ± 0.79	24.83 ± 2.69	0.64 ± 0.29	0.0024399
Pseudomonas aeruginosa	14.4 ± 0.74	22.4 ± 4.42	1.47 ± 0.87	0.000714	10.53 ± 0.52	20.67 ± 1.84	2.92 ± 0.89	0.0007104	10.2 ± 0.68	17.27 ± 2.05	1.94 ± 0.83	0.0007069	8.4 ± 0.51	18.87 ± 2.2	4.11 ± 1.13	0.0006981	10.27 ± 0.46	16.47 ± 2.53	1.63 ± 0.81	0.0006876	19.73 ± 1.16	24.13 ± 2.39	0.51 ± 0.26	0.0007193	18.33 ± 0.72	22.47 ± 1.96	0.51 ± 0.22	0.0007122	11.27 ± 0.7	21.47 ± 2.26	2.67 ± 0.69	0.0007175	18.13 ± 0.83	21.87 ± 1.68	0.46 ± 0.19	0.0007016	19.4 ± 0.63	25.67 ± 3.2	0.76 ± 0.36	0.0006842
Klebsiella pneumoniae	9.2 ± 0.42	19.1 ± 3.7	3.53 ± 2.18	0.0055719	11.3 ± 0.82	18.1 ± 1.2	1.57 ± 0.19	0.0057612	11.4 ± 0.84	19.7 ± 1.25	2.01 ± 0.38	0.0055407	10.3 ± 0.48	18.8 ± 1.81	2.36 ± 0.6	0.0057294	11.5 ± 0.53	18.5 ± 0.97	1.61 ± 0.4	0.0056977	20.3 ± 1.16	23.1 ± 2.13	0.3 ± 0.17	0.0087888	10.4 ± 0.52	20 ± 1.7	2.74 ± 0.72	0.0057294	17.2 ± 0.79	20.3 ± 1.34	0.4 ± 0.19	0.005825	8.7 ± 0.48	16.2 ± 1.81	2.53 ± 0.88	0.0055719	8.3 ± 0.48	13.6 ± 1.78	1.75 ± 0.8	0.0055719
Escherichia coli	10.5 ± 0.53	17.8 ± 1.62	1.9 ± 0.55	0.0058571	10.6 ± 0.7	20.8 ± 1.75	2.91 ± 0.88	0.0054786	11.4 ± 0.7	18.3 ± 1.16	1.6 ± 0.36	0.0058571	11.2 ± 0.79	17.8 ± 0.79	1.55 ± 0.29	0.0057294	11.3 ± 0.82	18.9 ± 2.08	1.81 ± 0.45	0.0058571	12.8 ± 2.04	20 ± 1.89	1.51 ± 0.43	0.0057294	16.9 ± 2.02	24 ± 2.11	1.09 ± 0.55	0.0057294	16.7 ± 1.06	19.9 ± 0.57	0.44 ± 0.2	0.0057294	13.7 ± 1.77	20.7 ± 2.5	1.32 ± 0.43	0.0055719	11.1 ± 0.99	17.9 ± 0.74	1.64 ± 0.39	0.0056977

## Sheet: S_Table7
Table S7: Statistical Comparison of AgNP3 Fold Increase Based on Bacterial Species
Bacteria_Species X	Bacteria_Species Y	statistic	pvalue	p.adj	p.adj.significance
Acinetobacter baumannii	Klebsiella pneumoniae	3.61194	0.0003039	0.0136764	*
Acinetobacter baumannii	Salmonella typhi	3.32606	0.0008808	0.0396374	*
Acinetobacter baumannii	Staphylococcus aureus	3.4833	0.0004953	0.0222874	*
Enterococcus faecalis	Escherichia coli	-3.42607	0.0006124	0.0275577	*
Listeria monocytogenes	Pseudomonas aeruginosa	-3.64566	0.0002667	0.0120019	*
Enterococcus faecalis	Pseudomonas aeruginosa	-4.57478	4.8e-06	0.0002145	***
Acinetobacter baumannii	Enterococcus faecalis	6.88515	5.8e-12	2.598e-10	****
Acinetobacter baumannii	Listeria monocytogenes	5.16426	2e-07	1.09e-05	****
Acinetobacter baumannii	Bacillus cereus	2.82862	0.0046749	0.21037	ns
Acinetobacter baumannii	Escherichia coli	2.5264	0.0115237	0.518565	ns
Acinetobacter baumannii	Pseudomonas aeruginosa	2.07153	0.0383096	1	ns
Acinetobacter baumannii	Serratia marcescens	2.59237	0.0095317	0.428925	ns
Bacillus cereus	Enterococcus faecalis	1.86763	0.0618137	1	ns
Bacillus cereus	Escherichia coli	-0.79282	0.427883	1	ns
Bacillus cereus	Klebsiella pneumoniae	-0.01566	0.987503	1	ns
Bacillus cereus	Listeria monocytogenes	1.86033	0.0628388	1	ns
Bacillus cereus	Pseudomonas aeruginosa	-1.36723	0.171554	1	ns
Bacillus cereus	Salmonella typhi	0.60856	0.542818	1	ns
Bacillus cereus	Serratia marcescens	-0.18817	0.850742	1	ns
Bacillus cereus	Staphylococcus aureus	-0.25394	0.799542	1	ns
Enterococcus faecalis	Klebsiella pneumoniae	-2.3834	0.0171535	0.771909	ns
Enterococcus faecalis	Listeria monocytogenes	0.4108	0.681219	1	ns
Enterococcus faecalis	Salmonella typhi	-0.98841	0.322954	1	ns
Enterococcus faecalis	Serratia marcescens	-2.09809	0.035897	1	ns
Enterococcus faecalis	Staphylococcus aureus	-2.83918	0.004523	0.203533	ns
Escherichia coli	Klebsiella pneumoniae	0.95182	0.341189	1	ns
Escherichia coli	Listeria monocytogenes	2.94094	0.0032721	0.147246	ns
Escherichia coli	Pseudomonas aeruginosa	-0.66574	0.505575	1	ns
Escherichia coli	Salmonella typhi	1.42405	0.154433	1	ns
Escherichia coli	Serratia marcescens	0.57554	0.564928	1	ns
Escherichia coli	Staphylococcus aureus	0.69849	0.484871	1	ns
Klebsiella pneumoniae	Listeria monocytogenes	2.16379	0.0304806	1	ns
Klebsiella pneumoniae	Pseudomonas aeruginosa	-1.70841	0.0875608	1	ns
Klebsiella pneumoniae	Salmonella typhi	0.70454	0.481096	1	ns
Klebsiella pneumoniae	Serratia marcescens	-0.20162	0.840215	1	ns
Klebsiella pneumoniae	Staphylococcus aureus	-0.29565	0.767496	1	ns
Listeria monocytogenes	Salmonella typhi	-1.14538	0.252052	1	ns
Listeria monocytogenes	Serratia marcescens	-2.0485	0.0405108	1	ns
Listeria monocytogenes	Staphylococcus aureus	-2.46434	0.0137265	0.617692	ns
Pseudomonas aeruginosa	Salmonella typhi	1.9801	0.047692	1	ns
Pseudomonas aeruginosa	Serratia marcescens	1.13677	0.255636	1	ns
Pseudomonas aeruginosa	Staphylococcus aureus	1.47396	0.140491	1	ns
Salmonella typhi	Serratia marcescens	-0.78597	0.431887	1	ns
Salmonella typhi	Staphylococcus aureus	-0.9412	0.346602	1	ns
Serratia marcescens	Staphylococcus aureus	-0.03036	0.975781	1	ns

## Sheet: S_Table8
Table S8: Statistical Comparison of AgNP3 Fold Increase Based on Antibiotics
Antibioticsx	Antibiotics_y	statistic	pvalue	p.adj	p.adj.significance
Ampicillin	Ciprofloxacin	-3.34305	0.00082864	0.0372888	*
Ampicillin	Nitrofurantoin	3.58503	0.000337042	0.0151669	*
Ampicillin	Chloramphenicol	-0.299196	0.764791	1	ns
Ceftazidime	Tetracycline	-3.6431	0.000269371	0.0121217	*
Chloramphenicol	Nitrofurantoin	3.88347	0.000102976	0.00463391	**
Ampicillin	Erythromycin	-2.48346	0.0130113	0.58551	ns
Ampicillin	Gentamicin	-1.01527	0.309976	1	ns
Cefepime	Colistin	4.62036	3.83083e-06	0.000172387	***
Gentamicin	Nitrofurantoin	4.59775	4.27084e-06	0.000192188	***
Cefepime	Ceftazidime	2.90317	0.00369407	0.166233	ns
Ampicillin	Cefepime	5.88369	4.01223e-09	1.80551e-07	****
Ampicillin	Ceftazidime	8.78686	1.53802e-18	6.92111e-17	****
Ampicillin	Colistin	10.4591	1.33153e-25	5.99188e-24	****
Ampicillin	Tetracycline	5.14375	2.69302e-07	1.21186e-05	****
Cefepime	Chloramphenicol	-6.18288	6.29411e-10	2.83235e-08	****
Cefepime	Nitrofurantoin	-2.28386	0.0223799	1	ns
Cefepime	Tetracycline	-0.739934	0.45934	1	ns
Cefepime	Ciprofloxacin	-9.22673	2.79007e-20	1.25553e-18	****
Cefepime	Erythromycin	-8.36715	5.90301e-17	2.65635e-15	****
Ceftazidime	Colistin	1.73938	0.0819685	1	ns
Cefepime	Gentamicin	-6.89896	5.23842e-12	2.35729e-10	****
Ceftazidime	Chloramphenicol	-9.08605	1.027e-19	4.6215e-18	****
Ceftazidime	Ciprofloxacin	-12.1299	7.33358e-34	3.30011e-32	****
Ceftazidime	Erythromycin	-11.2703	1.83909e-29	8.27592e-28	****
Chloramphenicol	Ciprofloxacin	-3.04385	0.00233571	0.105107	ns
Ceftazidime	Gentamicin	-9.80213	1.10236e-22	4.96064e-21	****
Chloramphenicol	Erythromycin	-2.18426	0.0289429	1	ns
Chloramphenicol	Gentamicin	-0.716077	0.473944	1	ns
Ceftazidime	Nitrofurantoin	-5.17972	2.22215e-07	9.99968e-06	****
Chloramphenicol	Colistin	10.756	5.55399e-27	2.49929e-25	****
Chloramphenicol	Tetracycline	5.44295	5.24055e-08	2.35825e-06	****
Ciprofloxacin	Erythromycin	0.859588	0.390016	1	ns
Ciprofloxacin	Gentamicin	2.32777	0.0199241	0.896586	ns
Ciprofloxacin	Colistin	13.7766	3.5265e-43	1.58692e-41	****
Ciprofloxacin	Nitrofurantoin	6.91966	4.52714e-12	2.03721e-10	****
Ciprofloxacin	Tetracycline	8.4868	2.12404e-17	9.55817e-16	****
Colistin	Erythromycin	-12.9235	3.31492e-38	1.49171e-36	****
Colistin	Gentamicin	-11.4666	1.94172e-30	8.73773e-29	****
Colistin	Nitrofurantoin	-6.8754	6.18175e-12	2.78179e-10	****
Erythromycin	Gentamicin	1.46819	0.142054	1	ns
Colistin	Tetracycline	-5.35463	8.57297e-08	3.85784e-06	****
Erythromycin	Nitrofurantoin	6.06224	1.34239e-09	6.04077e-08	****
Erythromycin	Tetracycline	7.62721	2.39884e-14	1.07948e-12	****
Gentamicin	Tetracycline	6.15903	7.31933e-10	3.2937e-08	****
Nitrofurantoin	Tetracycline	1.54579	0.122156	1	ns
